# Supplementary material for: Exercise Mitigates Alcohol Induced Endoplasmic Reticulum Stress Mediated Cognitive Impairment through ATF6-Herp Signaling
Source: PubMed Central journal article supplement (PMC5980102; doi:10.1038/s41598-018-23568-z), 2018-03-26
Supplement: 41598_2018_23568_MOESM1_ESM.pdf [file 41598_2018_23568_MOESM1_ESM.pdf]

# **Supplementary information**

(Full length blots/gels for main figures in the paper)

## **Exercise Mitigates Alcohol Induced Endoplasmic Reticulum Stress Mediated Cognitive Impairment through ATF6-Herp Signaling**

Akash K. George<sup>1</sup>, Jyotirmaya Behera<sup>1</sup>, Kimberly E. Kelly<sup>1</sup>, Nandan K. Mondal<sup>1</sup>, Kennedy P. Richardson<sup>1</sup>, Neetu Tyagi<sup>1,\*</sup>

<sup>1</sup>*Department of Physiology, University of Louisville School of medicine, Louisville, KY 40202*

## Full-length blots for Figure 3

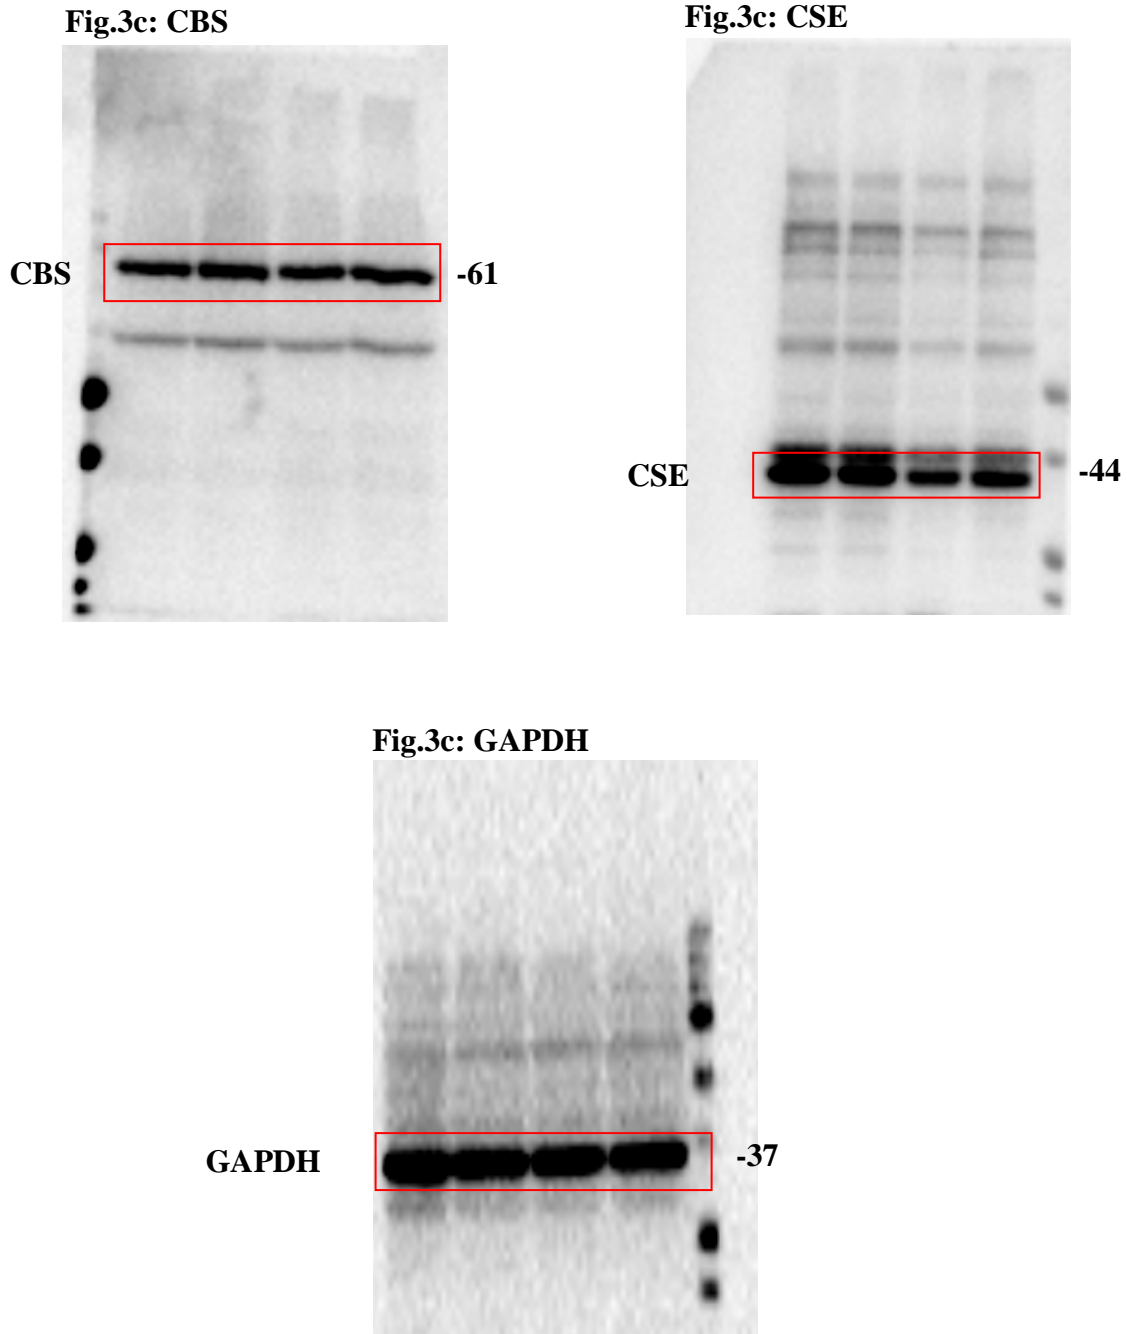

**Supplementary Fig. S1:** Uncropped gels/blots for main Figs. 3c. Boxed regions are used in the main figures. For some data, transferred membranes were horizontally cut for applying multiple antibodies. Lanes for unrelated samples are deleted. Lanes from left to right in red box: CT, EX, AL, AL+EX.

## Full-length blots for Figure 3

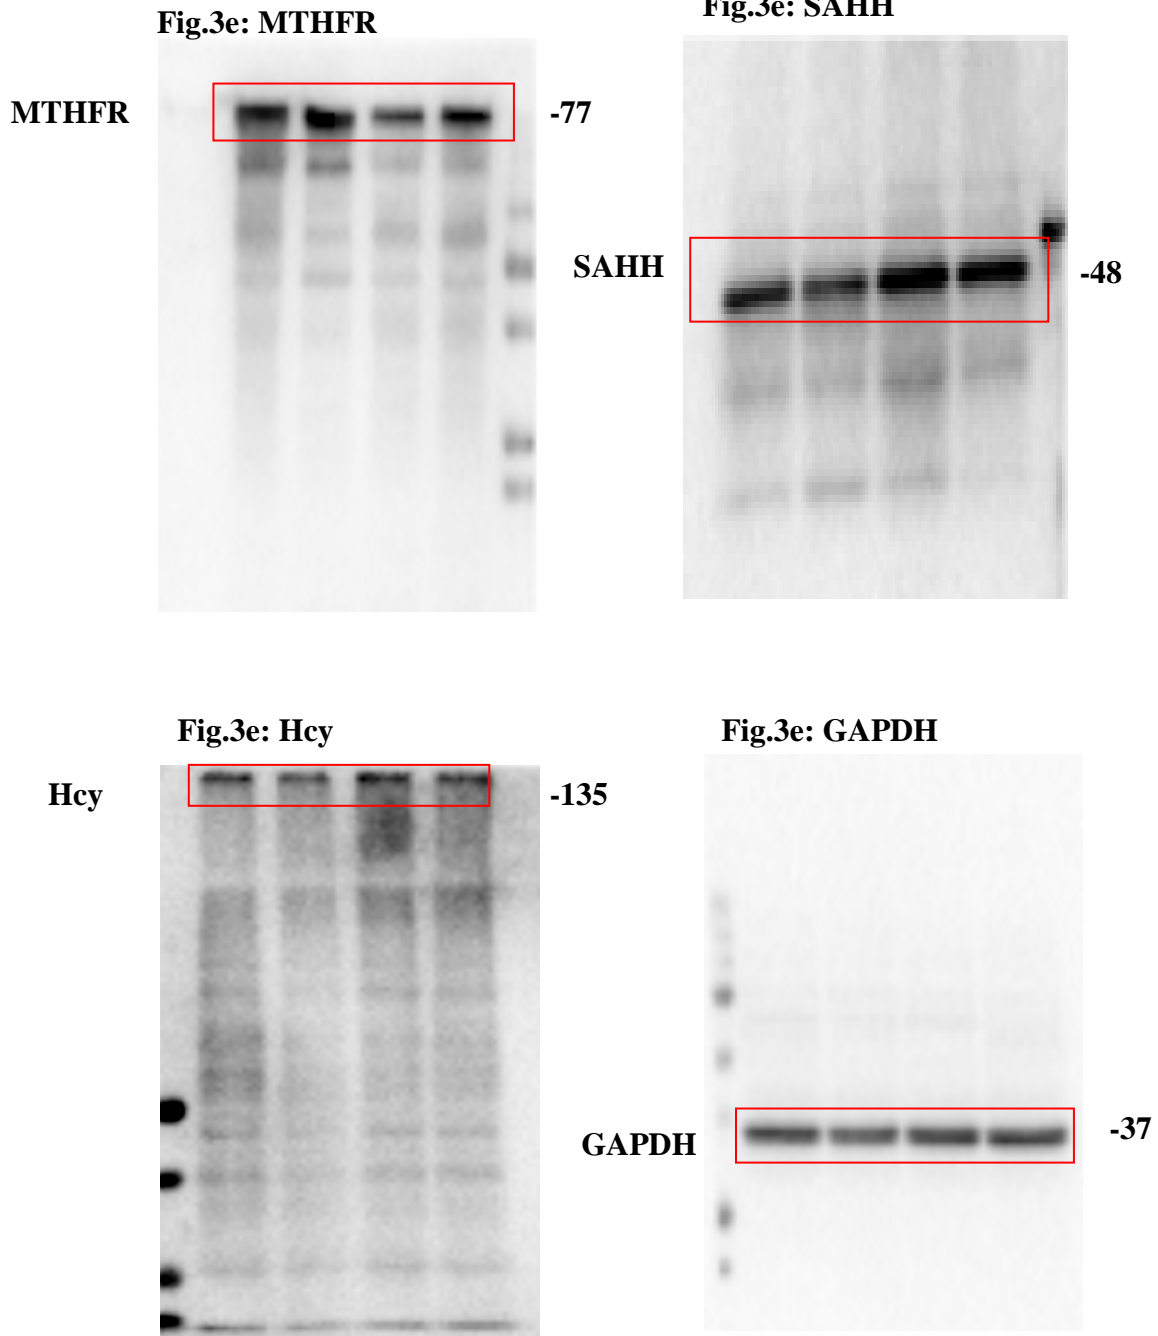

**Supplementary Fig. S2:** Uncropped gels/blots for main Figs. 3c. Boxed regions are used in the main figures. For some data, transferred membranes were horizontally cut for applying multiple antibodies. Lanes for unrelated samples are deleted. Lanes from left to right in red box: CT, EX, AL, AL+EX.

## Full-length blots for Figure 4

**Fig.4a: CAT**

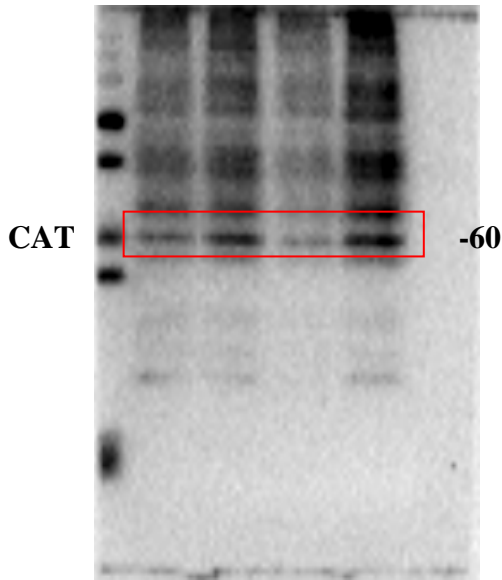

**Fig.4a: NOX4**

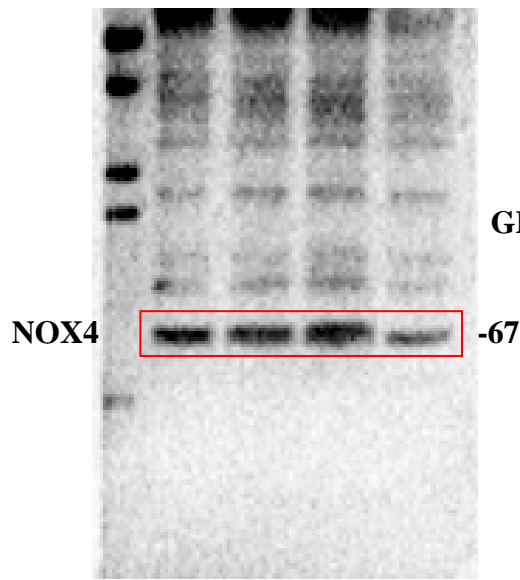

**Fig.4f: GRP78**

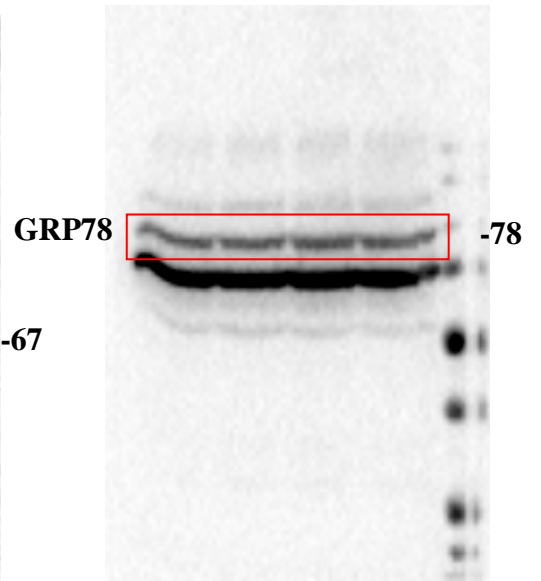

**Fig.4f: ATF6**

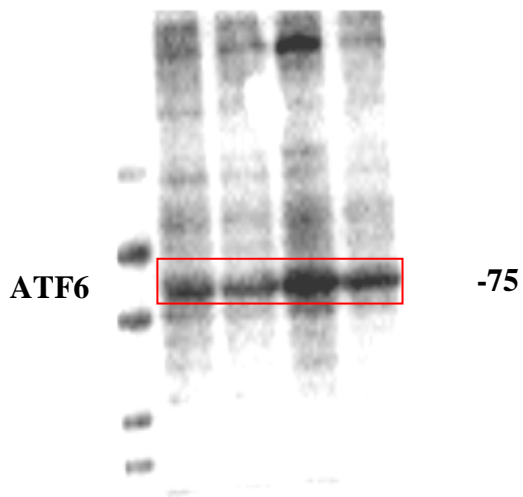

**Fig.4a,f: GAPDH**

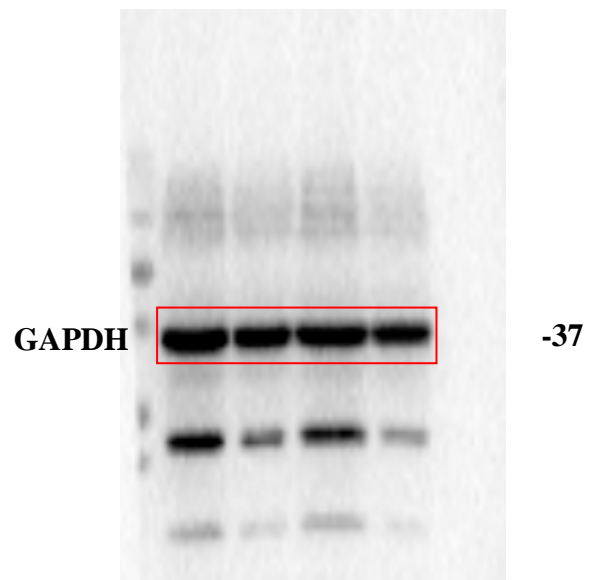

**Supplementary Fig. S3:** Uncropped gels/blots for main Figs. 4a,f. Boxed regions are used in the main figures. For some data, transferred membranes were horizontally cut for applying multiple antibodies. Lanes for unrelated samples are deleted. Lanes from left to right in red box: CT, EX, AL, AL+EX.

## Full-length blots for Figure 5

**Fig.5a: DNMT1**

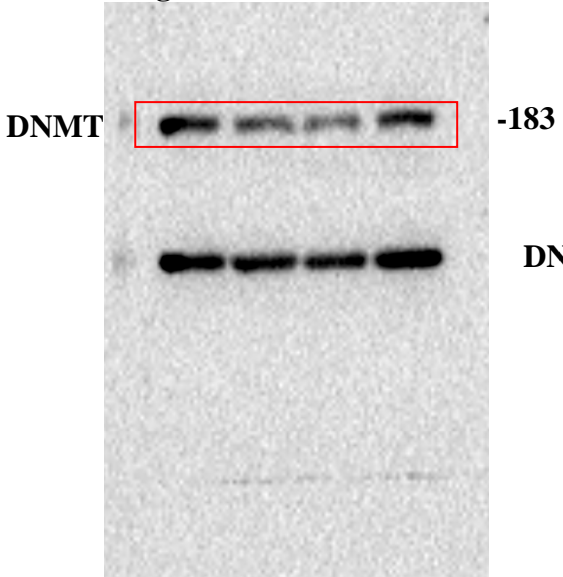

**Fig.5a: DNMT3a**

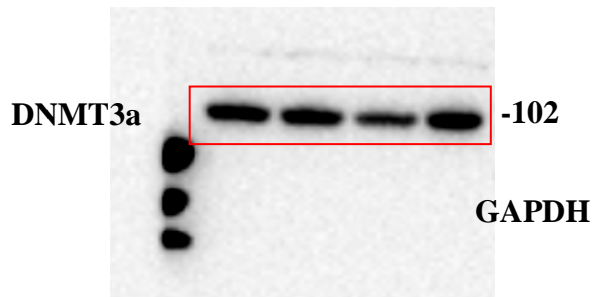

**Fig.5a: GAPDH**

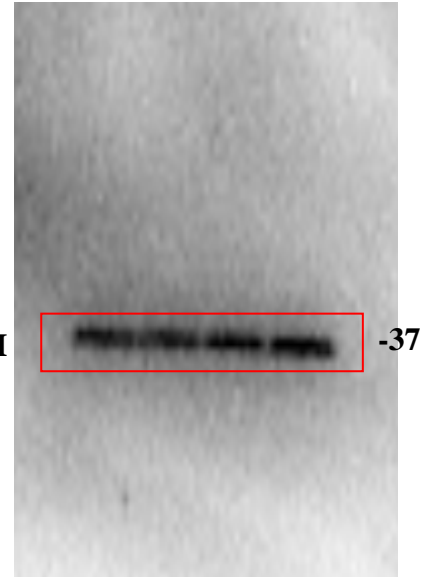

**Fig.5e: Herp chip**

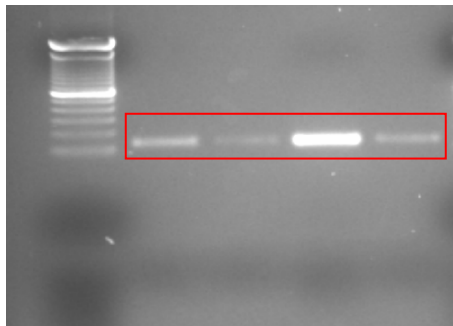

**Fig.5e: Input DNA**

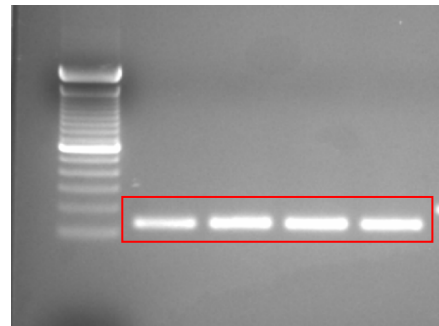

**Supplementary Fig. S4:** Uncropped gels/blots for main Figs. 5a,e. Boxed regions are used in the main figures. For some data, transferred membranes were horizontally cut for applying multiple antibodies. Lanes for unrelated samples are deleted. Lanes from left to right in red box: CT, EX, AL, AL+EX.

## Full-length blots for Figure 5

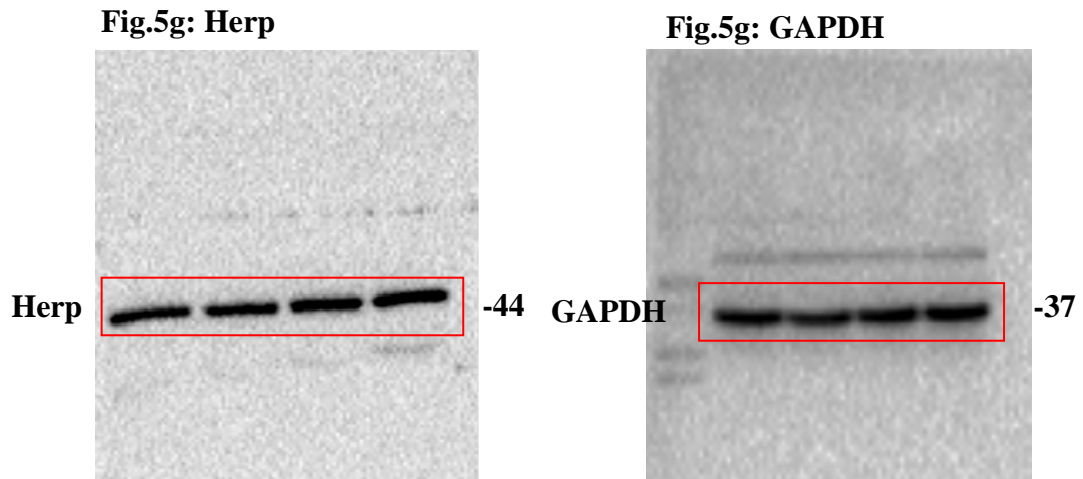

**Supplementary Fig. S5:** Uncropped gels/blots for main Figs. 5g. Boxed regions are used in the main figures. For some data, transferred membranes were horizontally cut for applying multiple antibodies. Lanes for unrelated samples are deleted. Lanes from left to right in red box: CT, EX, AL, AL+EX.

## Full-length blots for Figure 6

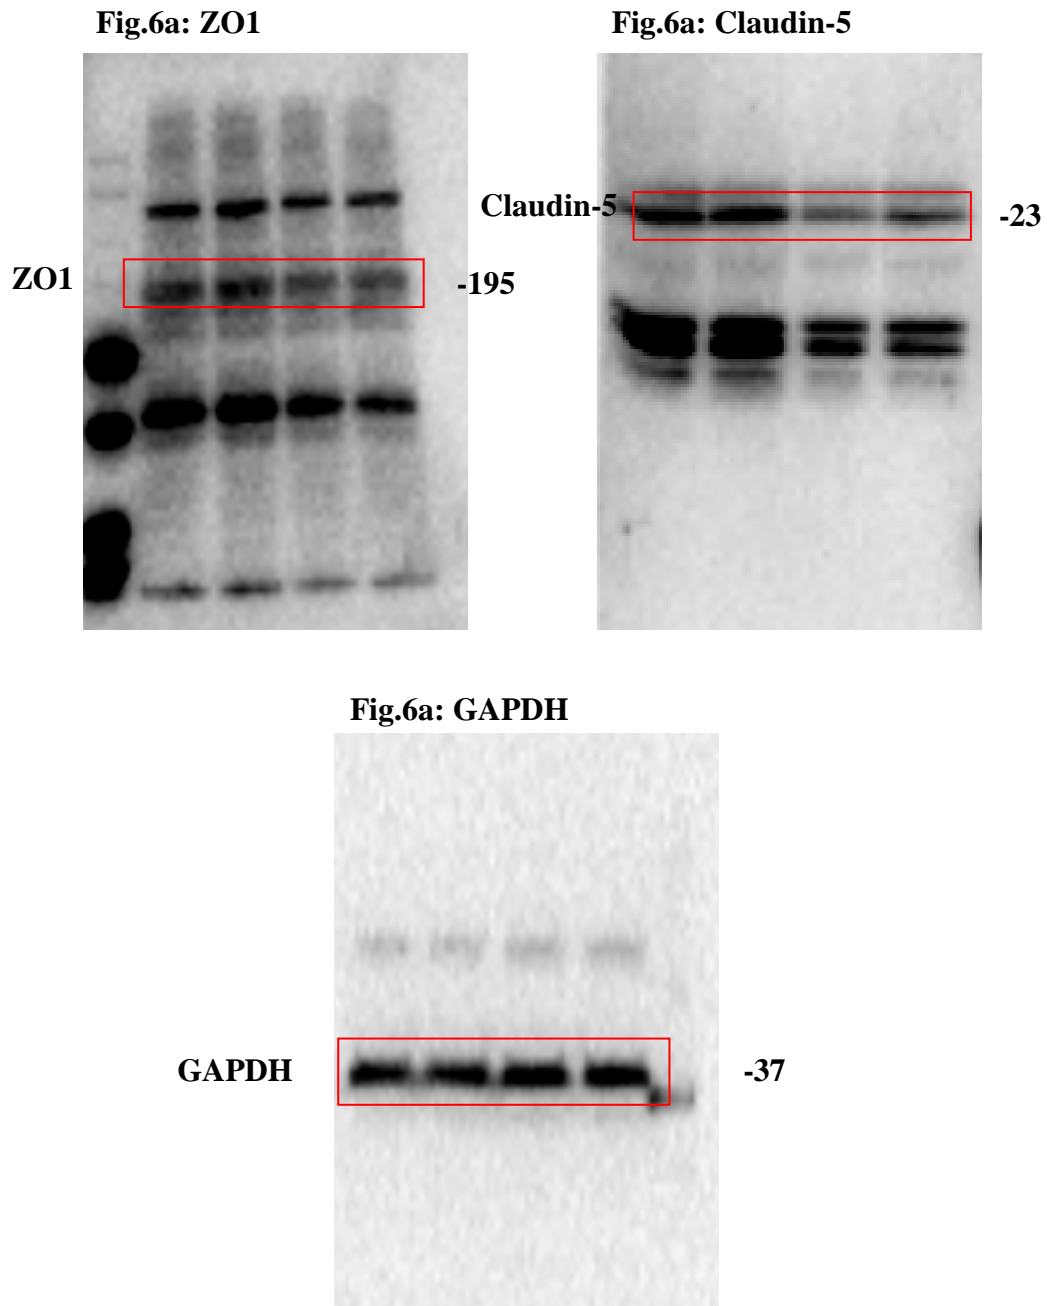

**Supplementary Fig. S6:** Uncropped gels/blots for main Figs. 6a. Boxed regions are used in the main figures. For some data, transferred membranes were horizontally cut for applying multiple antibodies. Lanes for unrelated samples are deleted. Lanes from left to right in red box: CT, EX, AL, AL+EX.

## Full-length blots for Figure 6

Fig.6i: VE-Cadherin

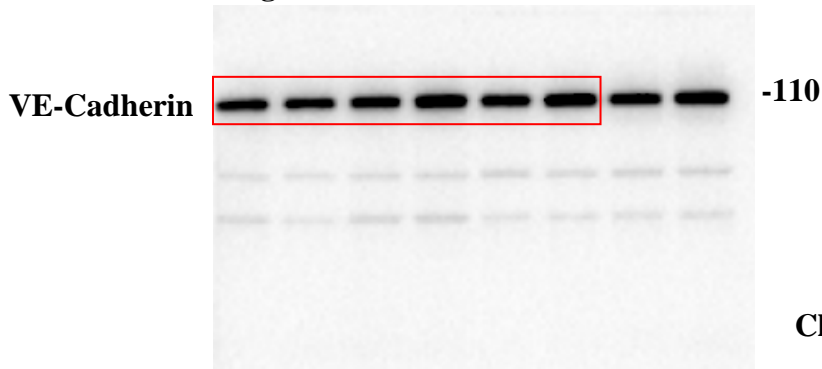

Fig.6i: Claudin-5

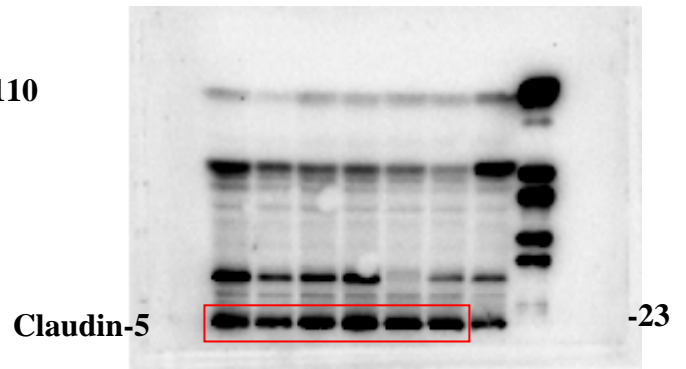

Fig.6i: ZO2

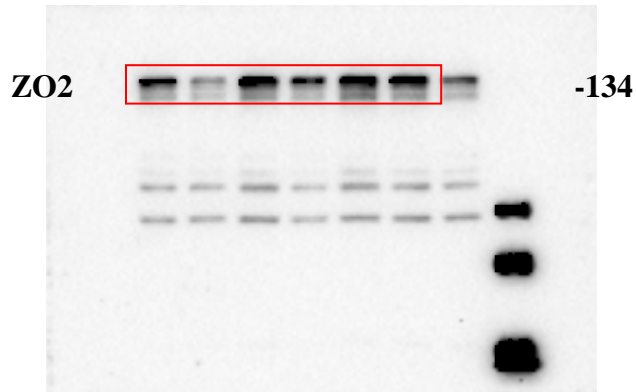

Fig.6i: GAPDH

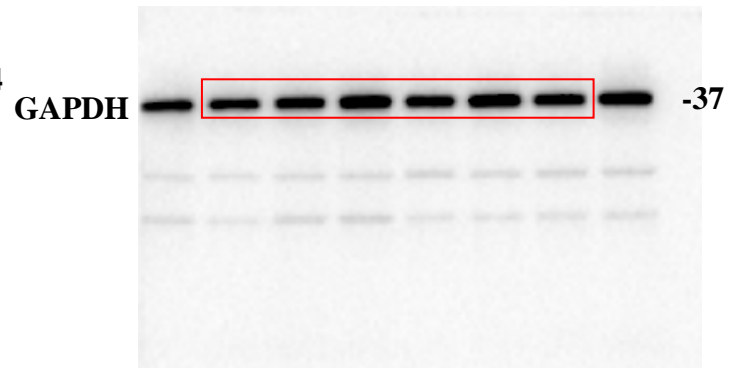

**Supplementary Fig. S7:** Uncropped gels/blots for main Figs. 6i. Boxed regions are used in the main figures. For some data, transferred membranes were horizontally cut for applying multiple antibodies. Lanes for unrelated samples are deleted. Lanes from left to right in red box: CT, AL, H<sub>2</sub>S, AL+H<sub>2</sub>S, DTT, AL+DTT.



## Full-length blots for Figure 7

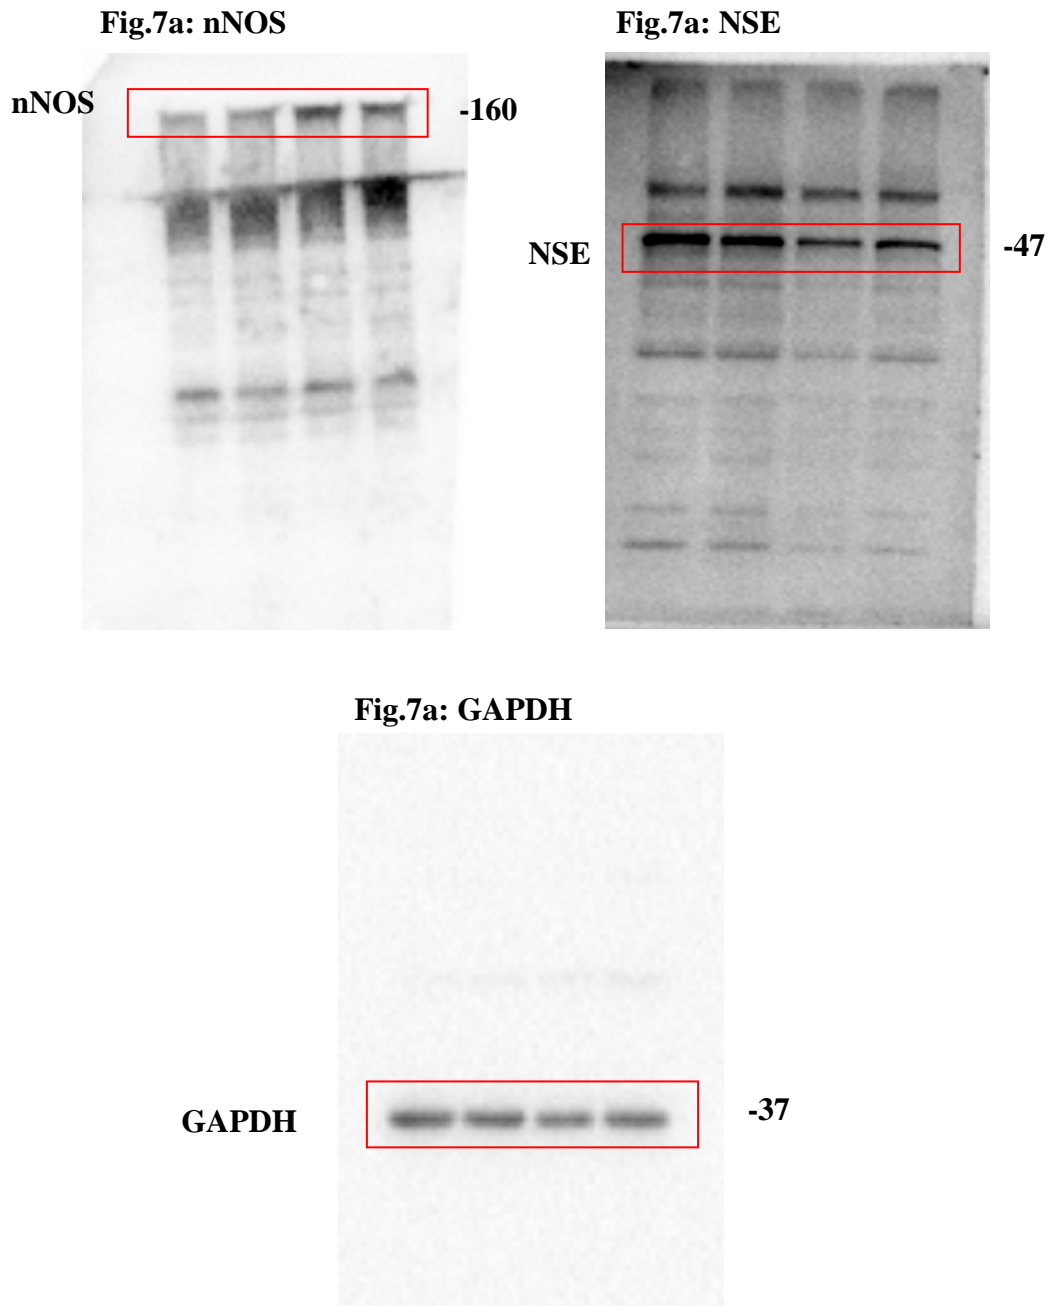

**Supplementary Fig. S8:** Uncropped gels/blots for main Figs. 7a. Boxed regions are used in the main figures. For some data, transferred membranes were horizontally cut for applying multiple antibodies. Lanes for unrelated samples are deleted. Lanes from left to right in red box: CT, EX, AL, AL+EX.
